# Supplementary material for: The effects of trunk kinematics and EMG activity of wheelchair racing T54 athletes on wheelchair propulsion speeds
Source: PeerJ. 2023 Aug 10;11:e15792. doi: 10.7717/peerj.15792 (PMC10423560; doi:10.7717/peerj.15792)
Supplement: Supplemental Information 1 [file peerj-11-15792-s001.xlsx]

## Sheet: range of movement of Joint
	X_TRUNK	Y_TRUNK	Z_TRUNK	X_LSHO	X_RSHO	Y_LSHO	Y_RSHO	Z_LSHO	Z_RSHO	X_LElb	X_RElb	Y_LElb	Y_RElb	Z_LElb	Z_RElb	X_LWrist	X_RWrist	Y_LWrist	Y_RWrist	Z_LWrist	Z_RWrist
20	17.39	1.6	2.26	87.76	79.62	29.6	26.79	84.26	72.4	108.99	103.18	38.32	36.3	63.11	64.19	34.24	56.29	73.7	92.08	45.41	51.91
20	18.32	2.6	7.72	85.46	80.79	27.96	38.05	68.91	74.42	106.69	115.4	46.17	41.79	69.94	63.42	60.01	62.79	92.39	79.9	54.29	41.03
20	12.94	1.94	2.87	84.98	69.02	28.94	43.55	67.84	45.2	105.13	101.14	41.34	37.17	76.94	45.97	49.19	43.9	79.38	81.42	50.77	63.8
20	9.97	1.11	4.47	82.09	89.66	23.82	34.21	78.26	86.44	124.44	90.74	29.17	29.35	92.1	359.04	64.19	68.44	85.82	89.32	79.53	83.5
20	17.16	1.06	3.82	98.5	103.93	18.43	28.5	85.31	87.87	115.03	128.88	25.59	25.13	91.35	109.74	48.33	55.7	79.49	71.31	54.22	53.56
20	10.44	1.63	3.8	68.66	85.76	35.68	14.7	62.92	72.4	96.79	100.74	48.85	40.99	57.53	63.57	67.27	43.91	77.07	91.84	39.25	39.27
20	9.69	1.95	4.32	82.23	86.65	23.57	44.35	78.7	74.87	349.99	126.25	60.06	38.39	354.08	81.82	79.82	33.02	79.95	67.64	0	40.18
20	7.36	5.22	6.07	69.57	77.41	28.02	36.14	51.43	56.17	101.82	103.94	42.85	30.25	64.52	68.01	44.98	30.49	58.74	66.71	40.99	35.77
20	5.02	4.43	5.01	78.61	84.02	23.85	41.88	73.18	81.26	166.74	137.91	46.51	48.23	133.37	97.72	112.55	81.63	57.84	53.8	35.54	43.23
20	7.77	5.88	8.01	59.19	72.99	17.4	40.16	39.05	62.5	98.21	89.42	56.82	52.93	72.73	55.09	50.37	54.45	60.64	77.86	36.74	42.28
20	9.47	3.32	11.26	74.3	77.42	13.32	38.24	53.38	70.25	131.55	132.82	48.6	47.04	78.58	91.55	61.28	63.97	59.46	79.39	50.19	31.62
20	6.67	1.29	1.71	79.1	74.11	36.36	32.66	37.89	45.9	114.13	105.67	41.63	35.71	83.94	57.9	54.77	41.22	73.47	83.21	47.67	53.39
25	14.93	1.42	2.6	95.59	87.38	34.87	26.07	89.29	78.55	111.01	97.59	37.67	34.97	63.9	62.57	41.15	63.62	74.29	96.06	46.24	52.99
25	22.73	3.99	8.25	90.82	87.13	31.92	39.38	74.15	83.44	107.57	117.78	46.87	37.58	67.12	66.06	63.21	54.53	96.51	77.55	51.28	41.8
25	14.38	2.25	3.39	92.5	77.16	32.49	46.03	69.22	49.99	108.65	105.49	42.41	36.7	85	50.47	54.9	50.98	83.29	83.92	57.48	67.58
25	20.26	1.87	4.75	92.96	99.49	16.85	25.01	89.25	92.27	121.87	85.7	31.1	32.4	89.66	58.93	67.97	70.07	84.59	91.61	80.3	85.8
25	22.12	1.24	4.18	110.71	124.18	21.85	30.8	93.52	106.11	128.33	139.42	31	31.79	103.43	118.36	51.31	50.3	77.76	65.48	55.79	50.77
25	12.12	1.81	3.39	75.43	87.49	36.09	18.06	66.31	67.25	95.27	95.83	50.9	37.87	56.37	55.86	68.77	59.61	80.13	91.8	42.86	50.53
25	7.46	2.06	4.57	80.68	91.83	24.68	43.95	75.54	76.26	337.74	127.71	63.92	42.21	353.25	79.17	102.59	37.23	77.82	71.39	0	41.69
25	10.57	6.68	6.96	73.81	86.69	28.84	37.42	44.16	58.79	93.81	102.78	43.48	29.67	59.29	69.64	54.04	31.87	62.18	69.43	43.71	35.98
25	7.41	5.41	5.08	84.37	97.32	28.62	47.97	72.66	93.64	165.65	140.18	50.25	53.59	129	98.17	70.08	83.19	55.01	56.98	30.6	41.03
25	10.69	6.56	9.05	63.05	85.49	16.21	42.84	39.7	74.38	99.8	89.1	57.74	53	83.74	59.89	54.85	57.67	62.3	81.45	45.17	43.84
25	15.1	4.1	13.68	82.49	89.77	14.6	43.23	54.32	84.38	136.85	137.54	57.17	48.51	107.53	97.16	78.78	76.37	82.68	91.63	61.65	35.7
25	7.88	1.47	1.73	84.17	80.52	37.56	34.96	41.82	53.11	114.74	109.74	40.53	36.13	84.27	57.98	57.33	47.69	73.78	82.13	49.72	57.88
30	20.77	1.8	2.8	99.22	90.78	34.42	25.55	94.66	79.74	112.08	98.94	38.42	34.85	65	60.21	37.15	66.42	71.6	100.9	43.9	54.24
30	28	4.67	10.19	99.08	100.26	31.44	38.93	76.89	95.7	103.65	119.91	48.11	40.58	68.51	77.35	65.14	53.94	97.41	75.39	58.31	44.11
30	16.77	2.69	4.42	99.25	86.22	35.53	46.52	76.31	54.99	114.95	109.14	45.08	37.73	91.27	51.94	52.86	51.91	79.57	82.27	55.52	70.94
30	25.83	2.13	5.04	98.49	112.98	13.61	22.41	89.97	99.51	120.55	81.99	31.59	32.13	94.85	53.98	74.84	67.29	81.47	93.44	83.9	83.16
30	25.64	2.01	3.34	124.49	133.81	25.75	33.43	104.2	111.05	120.96	133.54	33.5	29.97	105.44	108.64	61.69	66.72	79.66	66.21	54.32	52.88
30	14.84	2.45	4.87	83	97.39	38.54	19.12	68.17	71.7	98.16	98.72	49.89	37.32	65.74	62.79	67.67	52.99	78.47	87.38	47.19	47.8
30	11.12	2.15	6.26	84.33	90.61	31.39	44.7	81.34	87.57	330.32	120.38	61.59	41.22	349.93	76.23	92.29	37.84	69.09	67.57	0	44.13
30	16.72	7.44	7.43	80.84	96.41	33.01	37.55	43.48	60.94	88.96	103.12	43.93	28.31	55.1	70.93	53.75	28.14	67.38	68.74	44.26	31.97
30	9.13	5.99	6	90.41	108.5	29.1	54.21	82.71	114.78	167.81	142.65	54.1	52.09	133.34	105.68	80.03	78.87	58.12	55.37	29.72	42.88
30	13.98	8.37	9.63	68.56	102.26	15.59	45.43	44.4	92.95	96.65	90.67	57.48	54.34	74.49	69.22	77.95	61.73	70.52	84.34	46.98	50.26
30	21.96	5.41	13.82	93.72	97.91	14.76	41.83	53.14	91.85	141.45	138.69	57.25	49.28	124.36	99.15	73.93	81.31	79.41	99.21	58.83	34.78
30	10.05	1.43	1.9	90.19	88.11	36.53	37.42	48.81	59.32	117.03	114.04	41.4	38.11	87.75	61.47	60.6	51.91	77.68	82.08	49.95	64.95
MAX	29.67	2.87	3.36	117.39	107.63	38.49	32.24	100.21	88.56	118.95	104.55	40.95	37.35	71.71	60.06	36.81	66.39	75.59	110.26	46.69	65.39
MAX	35.11	5.97	7.35	116.46	127.44	29.51	34.4	70.57	102.02	95.19	115.65	51.14	43.11	66.25	83.58	67.58	52.37	87.48	60.51	71.8	55.69
MAX	24.42	2.32	7.58	94.28	100.16	39.58	27.51	90.13	83.35	67.18	86.01	29.59	28.82	73.06	68.86	97.42	68.85	87.91	88.88	104.5	83.75
MAX	26.94	2.15	6.94	102.2	121.45	13.04	24.9	87.23	101.9	120.25	85.23	30.05	31.29	97.62	54.35	71.94	73.42	85.18	92.89	80.87	85.75
MAX	29.6	2.59	3.82	128.72	140.72	24.7	32.85	111.09	115.99	116.46	130.63	33.42	29.53	104.53	104.28	65.34	69.65	77.19	66.12	54.05	50.38
MAX	26.75	3.4	14.63	118.33	113.21	36.55	23.31	88.96	68.69	94.81	90.41	49.36	39.49	62.77	55.86	61.8	55.63	78.5	93.22	46.57	53.44
MAX	23.36	3.42	7.38	93.12	119.29	29.24	56.56	76.33	111.79	256.75	120.33	56.31	38.95	244.85	72.85	83.97	49.68	65.79	60.45	0	62.7
MAX	24.1	8.32	11.16	91.2	115.61	33.02	38.77	42.34	67.77	88.25	102.93	44.32	28.24	57.97	68.33	50.17	32.29	64.7	66.45	43	35.37
MAX	24.62	8.84	6.52	107.56	130.89	30.12	50.75	103.72	135.04	207.94	143.11	52.95	51.9	148.78	107.13	67.31	74.59	58.13	54.42	28.73	43.71
MAX	19.16	5.32	8.72	99.86	90.32	25.47	31.56	72.41	67.45	102.39	90.85	58.57	54.35	79.22	62.49	76.97	76.31	76.4	91.36	47.34	47.88
MAX	28.19	3.54	4.66	101.84	105.36	26.71	27.14	74.97	87.56	117.86	148.75	56.01	51	93.51	117.09	72.53	88.82	83.97	99.23	54.13	50.05
MAX	24.01	2.84	4.38	107.09	108.07	39.75	42.69	75.52	84.8	123.72	118.09	47.56	34.21	91.73	60.3	64.9	59.15	75.45	75.55	50	60.54

## Sheet: Angular Velocity of Joint
	X_V_TRUNK	Y_V_TRUNK	Z_V_TRUNK	X_L_V_SHO	X_R_V_SHO	Y_L_V_SHO	Y_R_V_SHO	Z_L_V_SHO	Z_R_V_SHO	X_L_V_ELB	X_R_V_ELB	Y_L_V_ELB	Y_R_V_ELB	Z_L_V_ELB	Z_R_V_ELB	X_L_V_WRI	X_R_V_WRI	Y_L_V_WRI	Y_R_V_WRI	Z_L_V_WRI	Z_R_V_WRI
20	65.63	22.17	11.84	490.56	420.8	428.59	186.73	474.48	325.74	843.96	552.33	483.24	361.61	318.52	330.09	706.74	930.4	752.91	429.83	517.47	605.51
20	62.89	47.42	23.21	445.57	479.08	186.14	271.09	122.65	166.42	497.27	564.9	263.09	288.09	222.4	113.44	480.61	501.49	273.37	407.2	361.38	463.46
20	50.94	31.52	15.01	330.38	385.27	184.54	210.93	182.57	164.56	596.69	562.69	396.06	227.08	230.93	342.58	605.65	626.25	581.34	531.72	452.92	468.32
20	46.72	26.2	16.92	360.14	269.83	222.55	97.13	286.21	196.75	617.83	215.04	454.44	235.12	285.9	313.6	696.35	260.7	379.49	277.62	901.13	735.14
20	85.16	26.13	9.15	319.08	406.16	202.58	258.82	215.96	237.3	638.18	672.39	537.28	647.89	283.48	403.65	537.11	558.9	316.63	417.65	514.05	623.06
20	45.7	48.99	15.53	332.72	457.43	147.44	171.23	167.69	133.01	535.5	556.52	343.56	405.21	288.86	138.9	661.61	558.48	355.25	359.35	336.17	380.85
20	70.03	29.33	28.89	388.74	389.46	232.01	205.69	216.17	196.41	54.04	499.84	572.82	296.72	375.22	293.1	654.59	539.52	447.88	373.74	0	501.36
20	31.89	25.71	31.52	337.61	423.84	200.49	174.67	188.69	215.86	337.1	484.89	305.86	403.43	158.14	166.1	284.39	285.83	298.96	278.25	238.68	259.76
20	23.24	39.53	34.17	458.72	370.95	220.22	284.71	244.28	305.96	431.07	474.68	409.67	390.98	238.17	174.4	420.98	644.43	1230.22	411.65	192.19	222.91
20	46.71	59.52	40.29	352.36	277.73	114.95	303.78	133.92	300.97	546.92	514.61	396.12	473.82	303.13	246.87	358.82	496.59	324.17	442.86	292.82	386.21
20	63	60.71	30.82	449.78	375.57	141.09	324.71	180.94	288.13	539.19	487.22	388.89	491.86	317.7	159.83	401.71	620.25	366.84	291.33	312.49	229.81
20	31.93	21.67	10.3	481.01	400.5	161.86	181.16	145.1	132.27	594.41	538.92	392.7	217.01	275.23	220.81	530.47	460.94	425.81	336.15	413.35	438.36
25	76.22	32.85	15.1	571.51	476.09	445.81	259.26	695.97	408.49	1010.81	670.23	631.32	536.61	338.97	378.36	738.37	1195.63	979.52	411.84	659.63	728.16
25	86.61	50.98	30.78	530.13	531.27	221.5	347.59	147.32	177.2	620.75	678.42	312.17	335.57	273.2	112.04	452.26	555.12	395.7	389.27	401.78	434.99
25	62.7	40.58	14.74	395.76	465.71	213.61	282.23	222.05	179.83	758.13	774.8	520.86	344.53	290.49	506.85	757.91	864.45	617.03	626.2	596.32	670.68
25	88.55	22.9	20.1	453.59	337.4	409.21	93.67	297.76	253.12	698.94	594.33	637.52	460.13	356.91	382.89	870.66	870.67	411.71	265.99	1099.39	857.21
25	113.99	25.83	10.21	482.5	539.85	311.79	389.57	293.53	319.53	805.23	835.04	713.32	867.19	300.34	407.1	581.91	613.54	498.51	554.25	597.7	689.55
25	64.78	33.54	18.83	428.16	544.2	221.41	236.87	213.83	184.29	669.83	644.14	458.02	452.81	397.76	201.55	767.31	777.54	452.65	391.39	422.14	451.83
25	49.32	29.68	27.56	447	448.8	247.04	286.09	196.83	205.84	93.07	621.13	635.21	404.17	711.31	235.59	779.16	686.25	570.58	430.77	0	576.94
25	47.46	36.01	41.6	467.66	482.81	205.61	261.32	164.36	264.19	399.61	551.92	395.47	536.6	158.75	173.69	232.27	373.56	316.98	292.36	262.46	292.32
25	31.79	35.64	37.3	579.92	430.47	264.16	516.95	157.23	253.61	486.18	618.02	463.31	493.78	283.28	216.12	501.02	810.53	279.25	436.03	198.02	252.7
25	62.25	72.89	41.59	395.74	315.66	128.7	400.84	136.26	318.13	594.49	654.09	468.66	635.62	332.26	188.58	464.2	666.61	413.96	535.27	339.21	505.1
25	95.2	81.14	33.42	559.33	395.87	193.99	418.24	147.69	329.7	632.14	622.43	516.67	581.37	353.95	218.31	849.82	741	475.14	391.25	341.76	344.64
25	45.62	20.19	11.57	549.05	455.99	199.19	264.08	139.31	157.53	689.15	665.96	480.11	263.26	305.54	246.06	548.17	597.04	494.1	322.36	499.73	520.19
30	106	33.64	25.34	624.73	523.7	597.89	267.97	911.22	398.19	1129.96	774.46	752.92	625.26	354.32	362.39	605.84	1213.12	1004.3	430.25	741.31	796.03
30	135.33	73.4	42.54	614.06	530.74	266.47	423.88	265.7	228.3	791.34	801.77	378.76	361.59	345.22	241.15	602.65	649.03	516.06	432.12	530.64	548.99
30	84.61	64.21	19.66	501.27	544.06	223.98	371.78	281.6	225.61	874.95	856.54	629.23	428.09	352.54	566.49	878.52	1089.62	640.13	749.1	689.37	832.21
30	123.54	32.72	19.72	560.35	444.76	527.85	164.61	555.73	354.52	823.19	672.63	764.24	594.65	346.38	306.7	942.07	957.86	490.09	320.83	1265.89	926.26
30	122.03	41.09	19.28	637.87	584.48	466.46	449.94	349.94	483.76	920.09	908.45	846.25	891.1	299.34	511.33	692.69	847.48	529.86	564.46	640.52	734.38
30	63.81	47.24	19.97	529.75	646.43	286.21	283.57	246.46	200.7	826.7	735.44	540.02	462.59	463.26	205.26	822.36	839.36	418.66	388.13	509.52	545.9
30	63.7	48.64	32.99	527.06	471.35	272.52	397.62	210.61	331.8	127.36	823.33	778.01	529.69	735.88	230.77	954.12	462.79	667.82	677.82	1313.9	762.8
30	82.96	49.84	54.56	584.52	562.35	228.08	343.54	193.34	340.24	558.08	666.33	547.97	638.65	116.22	197.79	326.41	393.91	403.24	319.35	292.32	372.94
30	47.57	51.01	44.28	583.77	416.49	294.49	658.75	241.22	352.45	480.28	753.15	595.28	643.82	254.03	297.15	574.85	852.17	309.17	525.21	192.7	306.11
30	73.75	79.33	52.3	505.46	344.46	141.74	479.27	175.71	362.35	717.16	689.91	588.85	750.87	389.59	283.04	656.76	823.28	459.47	593.99	424.33	550.37
30	132.53	97.95	41.77	706.29	435.11	234.24	475.01	180.89	381.39	805.15	680.29	590.41	708.59	367.46	238.92	1133.54	854.14	560.74	455.51	464.74	530.08
30	60.76	24.83	9.66	620.74	534.61	216.81	368.24	175.38	227.37	803.27	836.51	561.46	320.16	339.92	283.8	627.72	642.53	486.04	318.96	612.69	637.53
MAX	215.31	35.74	41.77	996.22	881.73	1210.72	514.68	1318.97	724.86	1535.26	1262.52	1241.89	855.04	513.26	460.9	944.89	1290.04	989.96	1027.3	1158.42	1217.14
MAX	209.6	55.52	62.24	767.02	732.53	406.61	490.78	465.97	342.41	1066.33	961.33	589.6	470.36	420.35	555.59	788.47	611.64	579.85	434.74	674.47	687.91
MAX	186.58	71.05	35.56	520.48	687.58	461.96	274.21	449.52	410.55	1107.75	911.83	314.82	612.02	735.63	641.93	434.95	1196.3	678.37	487.95	669.77	901.61
MAX	176.84	59.03	22.01	728.56	530.87	615.79	196.8	562.44	361.55	834.54	726.28	907.17	730.5	284.33	292.22	749.53	1093.61	643.73	292.41	1434.69	1119.01
MAX	133.01	48.56	29.44	769.74	674.42	567.3	478.72	356.35	536.27	1030.07	994.07	748.79	942.75	333.92	537.14	751.96	901.97	549.48	521.59	689.91	768.56
MAX	239.95	140.18	55.2	739.2	874.57	530.56	384.1	340.1	363.47	1072.23	1028.44	617.43	611.71	658.3	293.92	1081.26	1151.1	682.6	502.19	779.55	768.98
MAX	172.86	61.39	30.32	747.92	589.37	344.12	622.34	344.18	485.17	406.47	1103.34	966.2	603.14	751.46	326.99	1101.15	602.3	748.73	1070.49	1377.32	1423.25
MAX	169.27	108.53	81.1	737.05	683.71	263.11	381.56	200.56	503.03	684.79	774.32	644.21	681.83	152.71	253.23	337.16	404.52	366.17	379.06	325.12	547.44
MAX	157.52	71.72	90.36	669.86	608.56	336.05	734.4	351.57	418.03	715.46	854.35	739.03	728.53	469.41	406.84	875.66	886.78	796.42	729.71	412.43	314.35
MAX	152.92	73.56	39.81	672.61	607.84	372.52	410.71	282.91	326.16	850.38	838.11	826.1	992.44	488.24	277.72	907.29	1278.98	560.93	754.6	506.2	631.7
MAX	175.22	37.68	42.3	757.95	639.02	383.43	395.52	270.83	343.61	958.63	757.72	606.76	685.51	574.84	433.59	1041.55	1263.51	691.7	590.64	549.95	672.4
MAX	170.95	46.07	20.88	754.93	675.56	636.4	608.2	623.77	656.2	716.46	991.47	723.38	478.16	304.56	253.62	735.18	793.59	465.85	470.56	750.86	923.5
