# Supplementary material for: The effects of trunk kinematics and EMG activity of wheelchair racing T54 athletes on wheelchair propulsion speeds
Source: PeerJ. 2023 Aug 10;11:e15792. doi: 10.7717/peerj.15792 (PMC10423560; doi:10.7717/peerj.15792)
Supplement: Supplemental Information 2 [file peerj-11-15792-s002.xlsx]

## Sheet: EMG 
	RRA_P_RMS	RRA_R_RMS	RRA_RE_RMS	RRA_P_Int	RRA_R_Int	RRA_RE_Int	RLT_P_RMS	RLT_R_RMS	RLT_RE_RMS	RLT_P_Int	RLT_R_Int	RLT_RE_Int
20	0.03	0.03	0.0202606	16.09	64.44	13.04	0.1	0.07	0.0818196	7.02	18.71	6.6
20	0.05	0	0.02	11.3	1.88	6.35	0.39	0.42	0.62	205.05	785.27	83.22
20	0	0	0	0	0	0	0.79	0.57	0.57	218.74	138.94	34.84
20	0	0	0	0	0	0	0.05	0.09	0.0456973	22.52	112.33	4.33
20	0	0	0	0	0	0	0.24	0.6	0.1	734.03	895.51	21.24
20	0.11	0.08	0.120067	50.63	143.47	25.03	0.07	0.03	0.0740215	15.8	38.39	8.65
20	0	0	0	0	0	0	0.04	0.04	0.0408464	15.85	56.89	6.03
20	0.42	0.1	0.289828	374.79	138.08	103.98	0.01	0.03	0.0124516	12.68	157.63	2.85
20	0	0	0	0	0	0	0.11	0.18	0.08	20.27	93.66	7.65
20	0.09	0.09	0.04	33.68	26.17	5.83	0.03	0.04	0.02	14.05	62.44	5.13
20	0.13	0.08	0.13	78.44	102.78	14.74	0.02	0.03	0.02	42.17	76.45	5.24
20	0	0	0	0	0	0	0.02	0.05	0.01	33.04	121.66	9.87
25	0.0139095	0	0.0352892	2.84	32.99	18.89	0.24463	0.42	0.143144	21.45	67	13.19
25	0.347322	0	0.352306	12.7	39.58	51.54	0.775514	0.58	0.0270143	311.32	1076.77	96.02
25	0	0	0	0	0	0	0.65	0.79	0.342725	148.19	158.44	30.32
25	0.286102	0	0.13	44.13	1.78	65.93	0.0700396	0.1	0.05	17.52	342.92	5.86
25	0.181975	0	0.160049	10.36	6.21	53.28	0.180018	0.28	0.132206	71.78	231.25	17.24
25	0.19	0.08	0.107886	57.62	170.88	26.21	0.04	0.07	0.0141298	13.7	53.99	4.82
25	0	0	0	0	0	0	0.12	0.11	0.0572337	76.7	33.88	25.26
25	0.52	0.12	0.3	329.95	156.34	84.1	0.09	0.12	0.09	65.91	390.33	37.04
25	0.102453	0	0.0531452	30.19	25.98	23.55	0.149745	0.25	0.098622	13.49	108	8.58
25	0.14	0.29	0.05	58.62	62.85	9.8	0.03	0.07	0.02	14.06	53.84	5.31
25	0.23	0.15	0.245774	76.62	102.31	36.53	0.01	0.02	0.0144324	6.48	23.1	3.29
25	0	0	0	0	0	0	0.03	0.06	0.0102885	27.43	103.06	6.83
30	0.1	0.01	0.2	30.06	210.68	86.23	0.4	0.59	0.2	31.61	58.55	20.6
30	1.30014	0.01	0.306805	304.32	82.46	147.18	0.492481	0.55	0.74723	246.82	1072.56	108.12
30	0	0	0.0108372	0	0	0	0.74607	0.67	0.325958	89.351	136.601	27.7425
30	0.662245	0	0.405211	14.09	30.84	111.45	0.0914517	0.25	0.0553696	13.62	310.41	6.36
30	0.58297	0	0.673829	5.76	26.77	115.54	0.322714	0.6	0.295982	85.2	248.63	32.05
30	0.182522	0.14	0.11648	66.07	168.76	31.54	0.019177	0.06	0.0387773	6.77	63.3	3.21
30	0.07	0	0.02	63.9	16	46.65	0.08	0.15	0.08	21.58	86.98	9.64
30	0.53	0.2	0.252743	395.76	266.64	113.57	0.03	0.29	0.0230105	22.02	379.3	4.97
30	0.0724952	0	0.06	15.09	19.51	39.06	0.171371	0.33	0.1	13.94	92.22	9.36
30	0.45	0.74	0.13	113.87	83.77	45.27	0.13	0.07	0.07	14.83	47.74	26.51
30	0.26	0.21	0.329845	65.44	106.01	32.33	0.01	0.03	0.0112653	7.23	47.12	3.18
30	0	0	0	0	0	0	0.03	0.07	0.01	28.89	87.72	7.56
MAX	0.934522	1.23	1.13092	291.07	137.65	719.93	1.15733	1.06	0.370112	53.22	57.65	78.24
MAX	1.03854	0.29	0.869604	202.69	178.53	320.3	0.457452	1.12	0.48911	230.54	1156.83	242.46
MAX	0.250269	0.4	0.453621	42.26	192.13	118.72	0.206313	0.82	0.306678	19.04	66.48	12.53
MAX	0.626201	0	0.750011	20.05	57.92	119.53	0.0851481	0.79	0.0491398	25.13	159.1	5.73
MAX	0.286684	0	0.488018	3.31	23.25	59.63	0.393933	0.58	0.166099	64.31	120.82	22.6
MAX	0.4	0.59	0.745065	54.37	215.02	122.44	0.09	0.34	0.131685	24.12	65.66	15.61
MAX	0.127369	0	0.225763	19.51	141.06	135.74	0.19907	0.65	0.0870062	39.61	97.29	9.6
MAX	0.844178	0.18	0.65645	238.39	188.42	172.49	0.042577	0.8	0.0398054	98.12	282.61	8.04
MAX	0.157231	0	0.133814	8.87	167.98	175.24	0.451538	0.86	0.110152	22.54	93.02	35.17
MAX	1.41733	1.4	0.43994	179.05	100.28	73.78	0.104153	0.24	0.0960018	27.34	230.35	12.5
MAX	0.267059	1.23	0.38	79.77	351.61	40.66	0.0237641	0.1	0.02	10.02	55.05	6.5
MAX	0.1	0.24	0.17433	41.01	183.08	49.26	0.23	0.38	0.14514	121.9	191.84	70.07
